# Supplementary material for: Trends in Ambulatory Analgesic Usage after Myocardial Infarction: A Nationwide Cross-Sectional Study of Real-World Data
Source: MDPI journal article supplement (doi:10.3390/healthcare10030446), 2022-02-26
Supplement: s1 [file s1]

## Supplementary

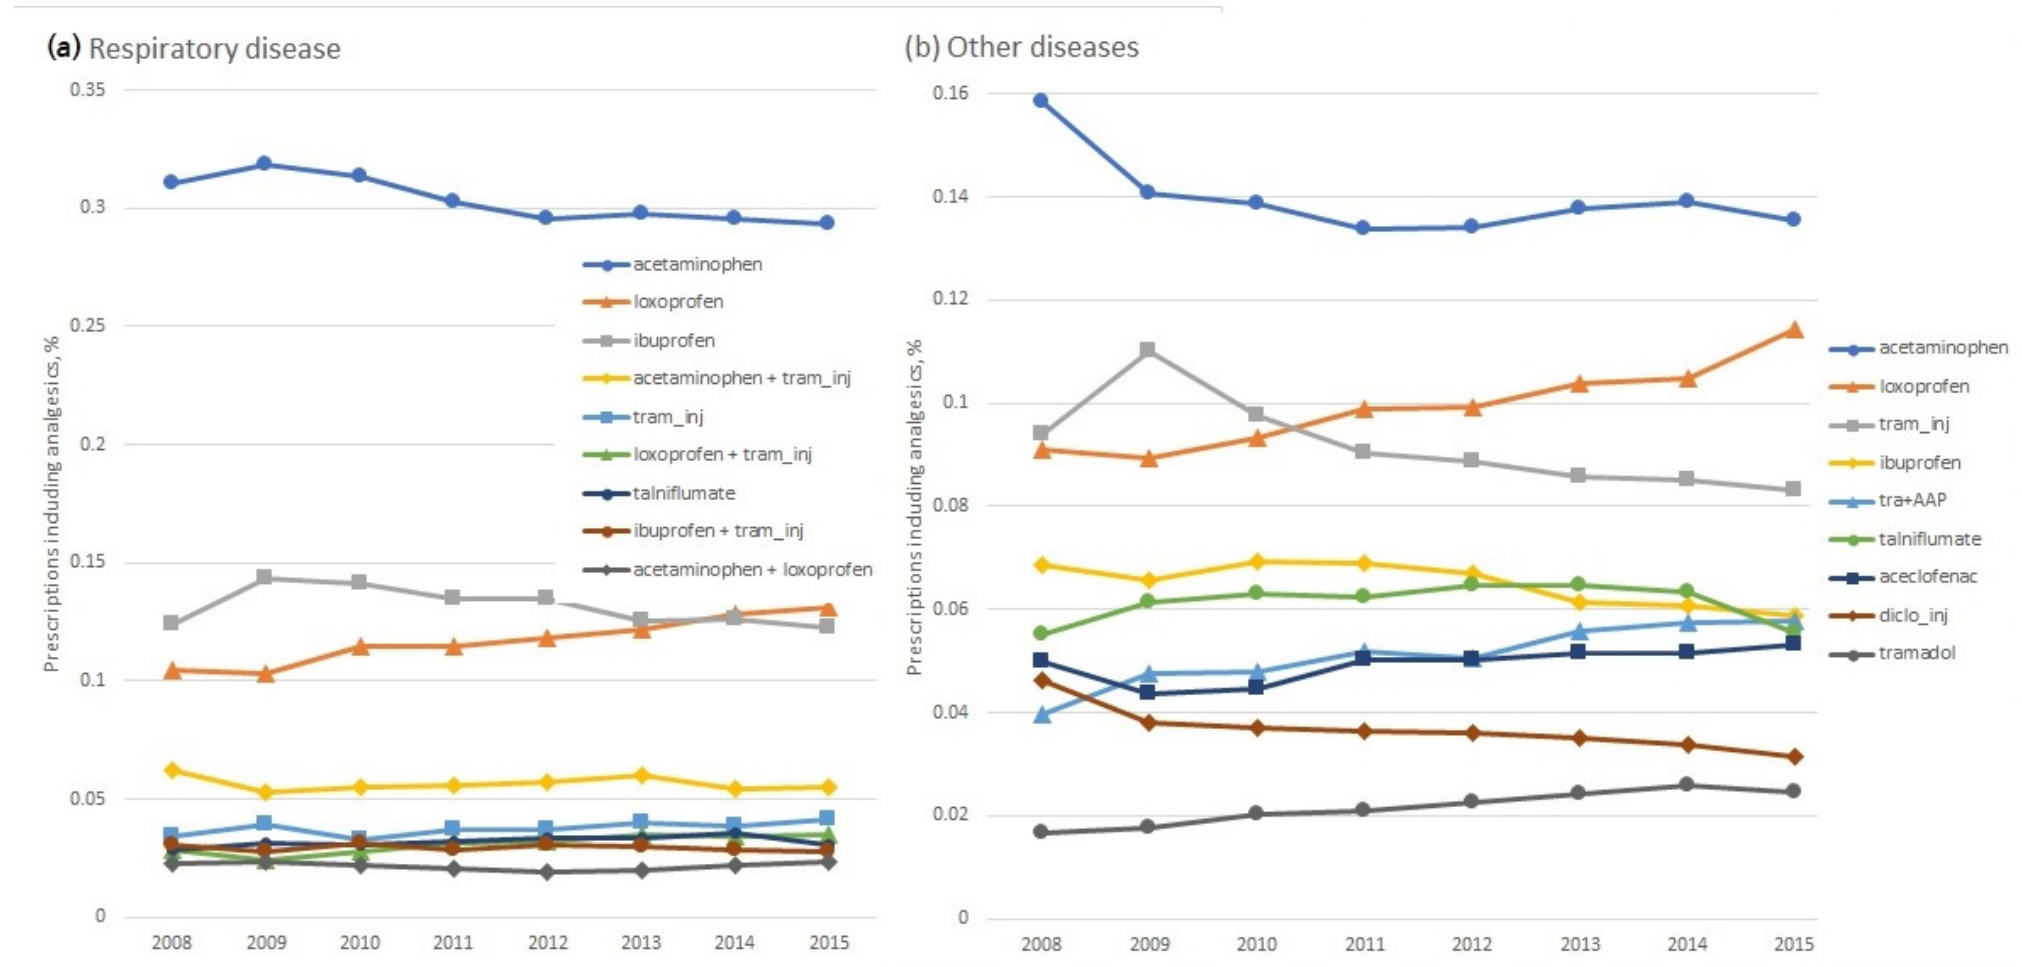

**Figure S1** The proportions of prescriptions of each analgesic and its time trends; (a) Respiratory diseases, and (b) other diseases
